# Supplementary material for: Determination of glycoside hydrolase specificities during hydrolysis of plant cell walls using glycome profiling
Source: PubMed Central journal article supplement (PMC5288845; doi:10.1186/s13068-017-0703-6), 2017-02-02
Supplement: 13068_2017_703_MOESM1_ESM.pdf [file 13068_2017_703_MOESM1_ESM.pdf]

## Supporting Information Table S1

Detailed list of cell wall glycan-directed monoclonal antibodies (mAbs) used for glycome profiling analyses. The groups of antibodies are based on a hierarchical clustering of ELISA data generated from a screen of all mAbs against a comprehensive panel of plant polysaccharide preparations [1, 2] that clusters mAbs according to the predominant polysaccharides recognized. The majority of listings link to the *WallMabDB* plant cell wall monoclonal antibody database (<http://www.wallmabdb.net>) that provides detailed descriptions of each mAb, including immunogen, antibody isotype, epitope structure (to the extent known), supplier information, and related literature citations.

| <u>Glycan Group Recognized</u>  | <u>mAb Names</u>                                                                 | <u>Epitope (If Known)</u> |
|---------------------------------|----------------------------------------------------------------------------------|---------------------------|
| Non-Fucosylated<br>Xyloglucan-1 | CCRC-M95<br>CCRC-M101                                                            |                           |
| Non-Fucosylated<br>Xyloglucan-2 | CCRC-M104<br>CCRC-M89<br>CCRC-M93<br>CCRC-M87<br>CCRC-M88                        |                           |
| Non-Fucosylated<br>Xyloglucan-3 | CCRC-M100<br>CCRC-M103                                                           |                           |
| Non-Fucosylated<br>Xyloglucan-4 | CCRC-M58<br>CCRC-M86<br>CCRC-M55<br>CCRC-M52<br>CCRC-M99                         |                           |
| Non-Fucosylated<br>Xyloglucan-5 | CCRC-M54<br>CCRC-M48<br>CCRC-M49<br>CCRC-M96<br>CCRC-M50<br>CCRC-M51<br>CCRC-M53 |                           |

|                                 |                                                                                                                                            |
|---------------------------------|--------------------------------------------------------------------------------------------------------------------------------------------|
| Non-Fucosylated<br>Xyloglucan-6 | CCRC-M57                                                                                                                                   |
| Fucosylated<br>Xyloglucan       | CCRC-M102<br>CCRC-M39<br>CCRC-M106<br>CCRC-M84<br>CCRC-M1 ( $\alpha$ -Fuc-(1,2)- $\beta$ -Gal) epitope<br>in fucosylated xyloglucan<br>[3] |
| Xylan-1/XG                      | CCRC-M111<br>CCRC-M108<br>CCRC-M109                                                                                                        |
| Xylan-2                         | CCRC-M119<br>CCRC-M115<br>CCRC-M110<br>CCRC-M105                                                                                           |
| Xylan-3                         | CCRC-M117<br>CCRC-M113<br>CCRC-M120<br>CCRC-M118<br>CCRC-M116<br>CCRC-M114                                                                 |
| Xylan-4                         | CCRC-M154 Arabinosylated xylan<br>epitopes [4]<br>CCRC-M150 Both homo- and<br>arabinosylated xylan<br>epitopes [4]                         |
| Xylan-5                         | CCRC-M144<br>CCRC-M146<br>CCRC-M145 Methyl GlcA substituted<br>xylan (Hahn, M.G,<br>unpublished data)                                      |

|                        |           |                                                             |
|------------------------|-----------|-------------------------------------------------------------|
|                        | CCRC-M155 | Methyl GlcA substituted xylan (Hahn, M.G, unpublished data) |
| Xylan-6                | CCRC-M153 | Homoxylyan epitopes DP>4 [4]                                |
|                        | CCRC-M151 | Homoxylyan epitopes DP>4 [4]                                |
|                        | CCRC-M148 | Homoxylyan epitopes DP>4 [4]                                |
|                        | CCRC-M140 | Homoxylyan epitopes DP>4 [4]                                |
|                        | CCRC-M139 | Homoxylyan epitopes DP>4 [4]                                |
|                        | CCRC-M138 | Homoxylyan epitopes DP>4 [4]                                |
| Xylan-7                | CCRC-M160 | Homoxylyan epitopes DP>3 [4]                                |
|                        | CCRC-M137 | Homoxylyan epitopes DP>3 [4]                                |
|                        | CCRC-M152 | Homoxylyan epitopes DP>3 [4]                                |
|                        | CCRC-M149 | Homoxylyan epitopes DP>3 [4]                                |
| Galactomannan-1        | CCRC-M75  |                                                             |
|                        | CCRC-M70  |                                                             |
|                        | CCRC-M74  |                                                             |
| Galactomannan-2        | CCRC-M166 |                                                             |
|                        | CCRC-M168 |                                                             |
|                        | CCRC-M174 |                                                             |
|                        | CCRC-M175 |                                                             |
| Acetylated Glucomannan | CCRC-M169 | [5]                                                         |
|                        | CCRC-M170 |                                                             |
| $\beta$ -Glucan        | LAMP      | 1,3 $\beta$ -glucan [6]                                     |
|                        | BG1       | 1,3; 1,4 $\beta$ -glucan [7]                                |

HG  
Backbone-1

CCRC-M131

CCRC-M38 de-esterified  $\alpha$ -1,4 linked homogalcturonan (HG) epitope [1]  
JIM5 Partially methyl esterified or de-esterified  $\alpha$ -1,4 linked homogalcturonan (HG) epitope [8]

HG  
Backbone-2

JIM136

JIM7 Partially methyl esterified  $\alpha$ -1,4 linked homogalcturonan (HG) epitope [8]

RG-I  
Backbone

CCRC-M69 [4)- $\alpha$ -D-GalpA-(1,2)- $\alpha$ -L-Rhap-(1,<sub>n</sub>) of RG-I backbone (Hahn, M.G, unpublished data)  
CCRC-M35 [4)- $\alpha$ -D-GalpA-(1,2)- $\alpha$ -L-Rhap-(1,) of RG-I backbone [9]  
CCRC-M36 [4)- $\alpha$ -D-GalpA-(1,2)- $\alpha$ -L-Rhap-(1,) of RG-I backbone (Hahn, M.G, unpublished data)  
CCRC-M14 [4)- $\alpha$ -D-GalpA-(1,2)- $\alpha$ -L-Rhap-(1,) of RG-I backbone (Hahn, M.G, unpublished data)  
CCRC-M129 [4)- $\alpha$ -D-GalpA-(1,2)- $\alpha$ -L-Rhap-(1,) of RG-I backbone (Hahn, M.G, unpublished data)  
CCRC-M72 [4)- $\alpha$ -D-GalpA-(1,2)- $\alpha$ -L-Rhap-(1,) of RG-I backbone (Hahn, M.G, unpublished data)

Linseed Mucilage

JIM3

|                          |                                                                                                                                                                                                                  |
|--------------------------|------------------------------------------------------------------------------------------------------------------------------------------------------------------------------------------------------------------|
| RG-I                     | CCRC-M40<br>CCRC-M161<br>CCRC-M164                                                                                                                                                                               |
| Physcomitrella<br>Pectin | CCRC-M98<br>CCRC-M94                                                                                                                                                                                             |
| RG-Ia                    | CCRC-M5<br>CCRC-M2                                                                                                                                                                                               |
| RG-Ib                    | JIM137<br>JIM101<br>CCRC-M61<br>CCRC-M30                                                                                                                                                                         |
| RG-Ic                    | CCRC-M23<br>CCRC-M17<br>CCRC-M19<br>CCRC-M18<br>CCRC-M56<br>CCRC-M16                                                                                                                                             |
| RG-I/Arabinogalactan     | CCRC-M60<br>CCRC-M41<br>CCRC-M80<br>CCRC-M79<br>CCRC-M44<br>CCRC-M33<br>CCRC-M32<br>CCRC-M13<br>CCRC-M42<br>CCRC-M24<br>CCRC-M12<br><br>CCRC-M7 $\beta$ -(1,6)-Gal) DP>3 [10]<br>CCRC-M77<br>CCRC-M25<br>CCRC-M9 |

|  |           |
|--|-----------|
|  | CCRC-M128 |
|  | CCRC-M126 |
|  | CCRC-M134 |
|  | CCRC-M125 |
|  | CCRC-M123 |
|  | CCRC-M122 |
|  | CCRC-M121 |
|  | CCRC-M112 |
|  | CCRC-M21  |
|  | JIM131    |
|  | CCRC-M22  |
|  | JIM132    |
|  | JIM1      |
|  | CCRC-M15  |
|  | CCRC-M8   |
|  | JIM16     |

|                   |        |
|-------------------|--------|
| Arabinogalactan-1 | JIM93  |
|                   | JIM94  |
|                   | JIM11  |
|                   | MAC204 |
|                   | JIM20  |

|                   |           |
|-------------------|-----------|
| Arabinogalactan-2 | JIM14     |
|                   | JIM19     |
|                   | JIM12     |
|                   | CCRC-M133 |
|                   | CCRC-M107 |

|                   |          |
|-------------------|----------|
| Arabinogalactan-3 | JIM4     |
|                   | CCRC-M31 |
|                   | JIM17    |
|                   | CCRC-M26 |
|                   | JIM15    |
|                   | JIM8     |
|                   | CCRC-M85 |
|                   | CCRC-M81 |
|                   | MAC266   |

PN 16.4B4

Arabinogalactan-4  
MAC207  
JIM133  
JIM13  
CCRC-M92  
CCRC-M91  
CCRC-M78

Unidentified  
MAC265  
CCRC-M97

## References

1. Pattathil S, Avci U, Baldwin D, Swennes AG, McGill JA, Popper Z, Bootten T, Albert A, Davis RH, Chennareddy C *et al*: **A comprehensive toolkit of plant cell wall glycan-directed monoclonal antibodies**. *Plant Physiol* 2010, **153**(2):514-525.
2. Pattathil S, Avci U, Miller JS, Hahn MG: **Immunological approaches to plant cell wall and biomass characterization: Glycome Profiling**. *Methods Mol Biol* 2012, **908**:61-72.
3. Puhlmann J, Bucheli E, Swain MJ, Dunning N, Albersheim P, Darvill AG, Hahn MG: **Generation of monoclonal antibodies against plant cell-wall polysaccharides. I. Characterization of a monoclonal antibody to a terminal alpha-(1-->2)-linked fucosyl-containing epitope**. *Plant Physiol* 1994, **104**(2):699-710.
4. Schmidt D, Schuhmacher F, Geissner A, Seeberger PH, Pfrengle F: **Automated synthesis of arabinoxylan-oligosaccharides enables characterization of antibodies that recognize plant cell wall glycans**. *Chemistry* 2015, **21**(15):5709-5713.
5. Zhang X, Rogowski A, Zhao L, Hahn MG, Avci U, Knox JP, Glibert HJ: **Understanding how the complex molecular architecture of mannan-degrading hydrolases contributes to plant cell wall degradation**. *J Biol Chem* 2014, **289**:2002-2012.
6. Meikle PJ, Bonig I, Hoogenraad NJ, Clarke AE, Stone BA: **The location of (1-->3)-beta-glucans in the walls of pollen tubes of *Nicotiana alata* using a (1-->3)-beta-glucan-specific monoclonal antibody**. *Planta* 1991, **185**(1):1-8.
7. Meikle PJ, Hoogenraad NJ, Bonig I, Clarke AE, Stone BA: **A (1-->3,1-->4)-beta-glucan-specific monoclonal antibody and its use in the quantitation and immunocytochemical location of (1-->3,1-->4)-beta-glucans**. *Plant J* 1994, **5**(1):1-9.
8. Clausen MH, Willats WG, Knox JP: **Synthetic methyl hexagalacturonate hapten inhibitors of anti-homogalacturonan monoclonal antibodies LM7, JIM5 and JIM7**. *Carbohydr Res* 2003, **338**(17):1797-1800.

9. Young RE, McFarlane HE, Hahn MG, Western TL, Haughn GW, Samuels AL: **Analysis of the Golgi apparatus in Arabidopsis seed coat cells during polarized secretion of pectin-rich mucilage.** *Plant Cell* 2008, **20**(6):1623-1638.
10. Steffan W, Kovac P, Albersheim P, Darvill AG, Hahn MG: **Characterization of a monoclonal antibody that recognizes an arabinosylated (1-->6)-beta-D-galactan epitope in plant complex carbohydrates.** *Carbohydr Res* 1995, **275**(2):295-307.
